# Supplementary material for: Enhanced removal of toxic Cr(vi) and Pb(ii) from water using carboxylic terminated Ti3C2Tx nanosheets
Source: Royal Society of Chemistry journal article supplement (doi:10.1039/d3ra03456a), 2023-01-01
Supplement: d3ra03456a1.pdf [file d3ra03456a1.pdf]

## Supplementary Information

### Enhanced Removal of Toxic Cr(VI) and Pb(II) from Water Using Carboxylic Terminated $Ti_3C_2T_x$ Nanosheets

**Table S1**

Stock solutions of batch-1 and their further analysis under various sonication and temperatures conditions. An aliquots of 10 mL from each sub-sample solution # was collected with a regular interval of 2 min. Likewise 400 ppm and 600 ppm stock solutions and their sub-sample solutions were prepared and evaluated.

| Conditions                    | 200 ppm - $Pb(NO_3)_2$ Solutions<br>(600 mL) |                      |                      | 200 ppm - $K_2Cr_2O_7$ Solutions<br>(600 mL) |                      |                      |
|-------------------------------|----------------------------------------------|----------------------|----------------------|----------------------------------------------|----------------------|----------------------|
|                               | 25 °C                                        | 50 °C                | 75 °C                | 25 °C                                        | 50 °C                | 75 °C                |
| <b>Sonication</b><br>(10 min) | Sample #1<br>(60 mL)                         | Sample #4<br>(60 mL) | Sample #7<br>(60 mL) | Sample #1<br>(60 mL)                         | Sample #4<br>(60 mL) | Sample #7<br>(60 mL) |
| <b>Sonication</b><br>(20 min) | Sample #2<br>(60 mL)                         | Sample #5<br>(60 mL) | Sample #8<br>(60 mL) | Sample #2<br>(60 mL)                         | Sample #5<br>(60 mL) | Sample #8<br>(60 mL) |
| <b>Sonication</b><br>(30 min) | Sample #3<br>(60 mL)                         | Sample #6<br>(60 mL) | Sample #9<br>(60 mL) | Sample #3<br>(60 mL)                         | Sample #6<br>(60 mL) | Sample #9<br>(60 mL) |

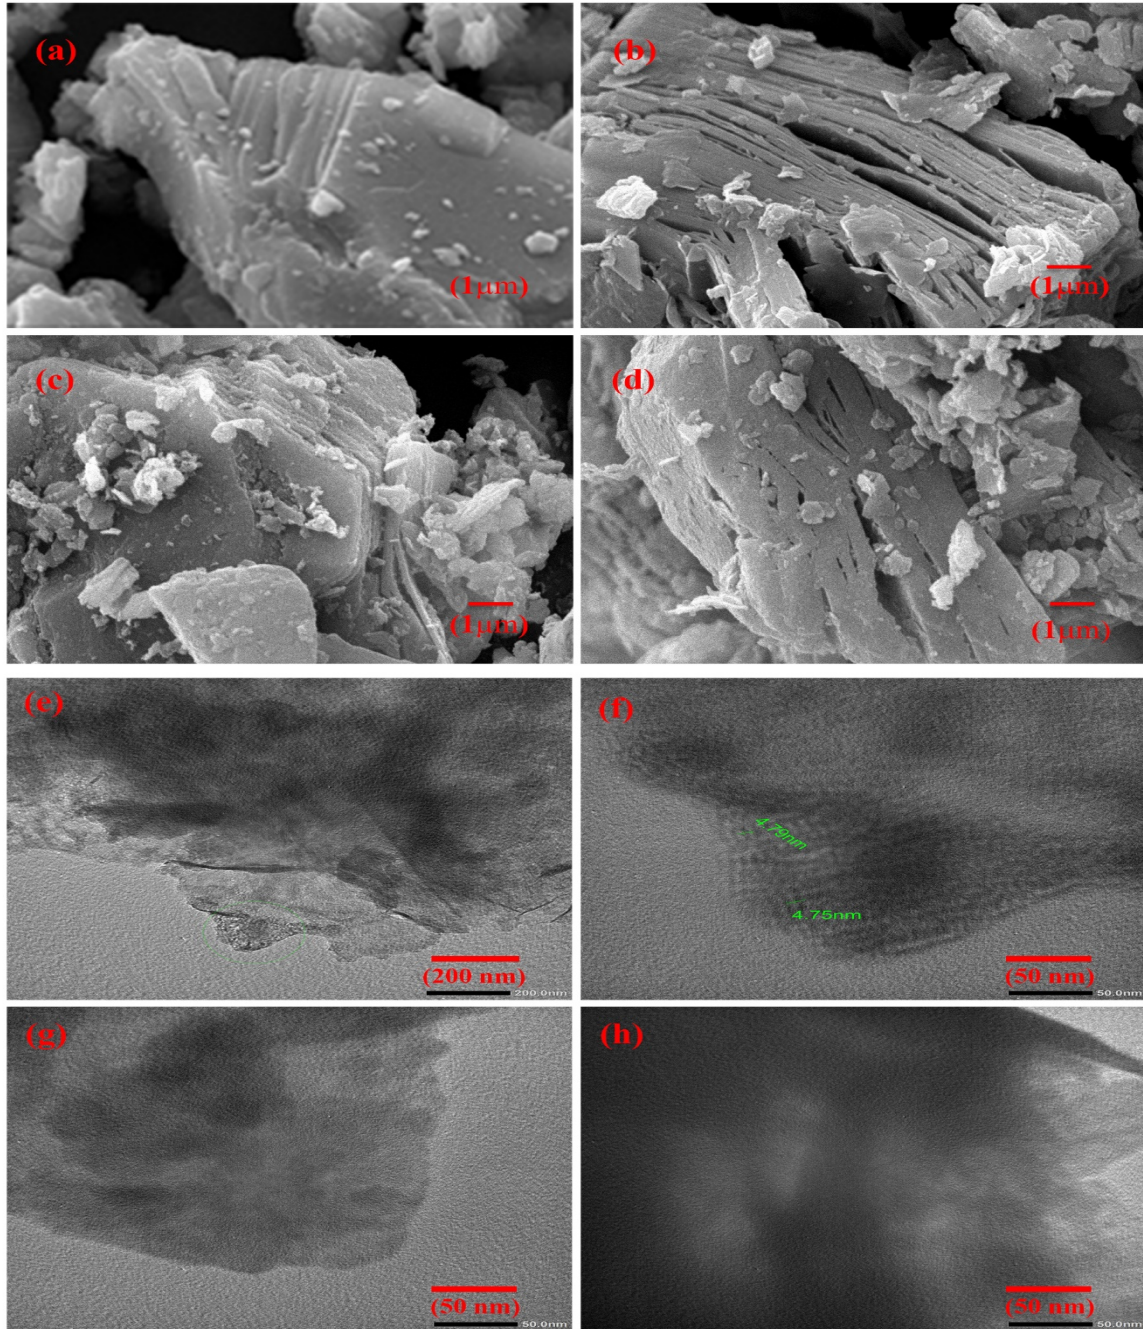

**Figure S1.** SEM images of (a)  $\text{Ti}_3\text{AlC}_2$  MAX phase (b)  $\text{Ti}_3\text{C}_2\text{T}_x$  MXenes (c)  $\text{Cr-Ti}_3\text{C}_2\text{T}_x$  and (d)  $\text{Pb-Ti}_3\text{C}_2\text{T}_x$  nanosheets., and TEM images of (e) and (f)  $\text{Ti}_3\text{C}_2\text{T}_x$  MXenes (g)  $\text{Cr-Ti}_3\text{C}_2\text{T}_x$  and (h)  $\text{Pb-Ti}_3\text{C}_2\text{T}_x$  nanosheets.

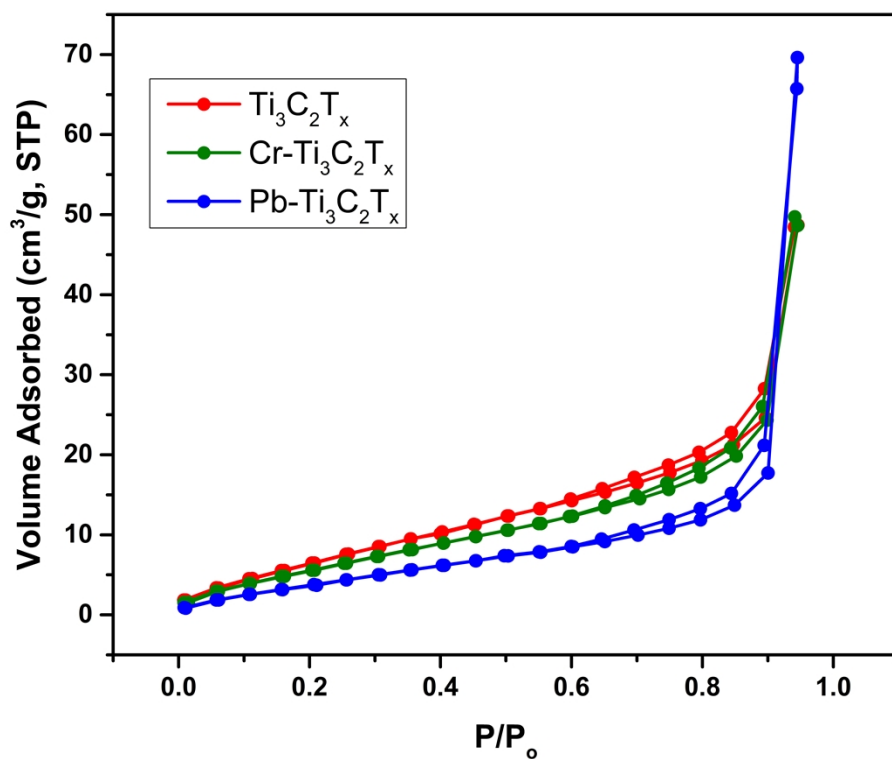

**Figure S2.** N<sub>2</sub> adsorption-desorption isotherms of the MXenes nanosheets before and after metal ions adsorption.

**Table S2**

EDX results of Ti<sub>3</sub>AlC<sub>2</sub> MAX phase and pre and post adsorption Ti<sub>3</sub>C<sub>2</sub>T<sub>x</sub> samples.

| Samples                                          | Elements (At.%) |      |      |      |     |     |     |     |
|--------------------------------------------------|-----------------|------|------|------|-----|-----|-----|-----|
|                                                  | Ti              | Al   | C    | O    | F   | N   | Cr  | Pb  |
| Ti <sub>3</sub> AlC <sub>2</sub>                 | 30.5            | 20.9 | 48.6 | -    | -   | -   | -   | -   |
| Ti <sub>3</sub> C <sub>2</sub> T <sub>x</sub>    | 25.3            | -    | 28.2 | 30.1 | 9.4 | 6.9 | -   | -   |
| Cr-Ti <sub>3</sub> C <sub>2</sub> T <sub>x</sub> | 37.2            | -    | 25.0 | 29.7 | 3.5 | 2.4 | 2.3 | -   |
| Pb-Ti <sub>3</sub> C <sub>2</sub> T <sub>x</sub> | 35.2            | -    | 27.4 | 26.5 | 3.8 | 5.8 | -   | 1.3 |

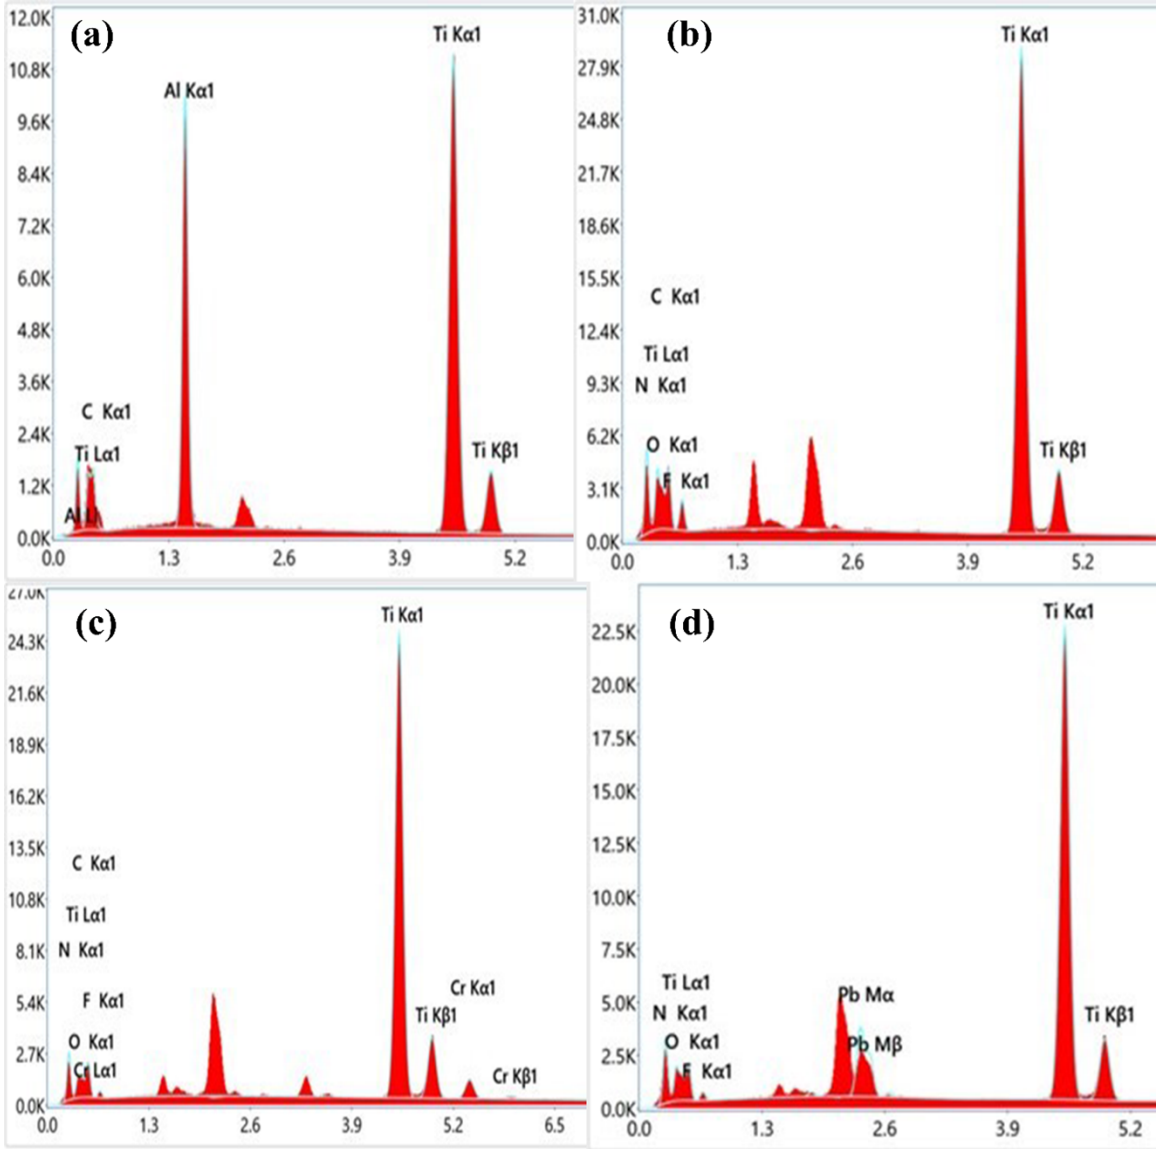

**Figure S3:** EDX spectrums of (a)  $\text{Ti}_3\text{AlC}_2$  MAX phase (b)  $\text{Ti}_3\text{C}_2\text{T}_x$  MXenes (c)  $\text{Cr-Ti}_3\text{C}_2\text{T}_x$  and (d)  $\text{Pb-Ti}_3\text{C}_2\text{T}_x$  nanosheets.

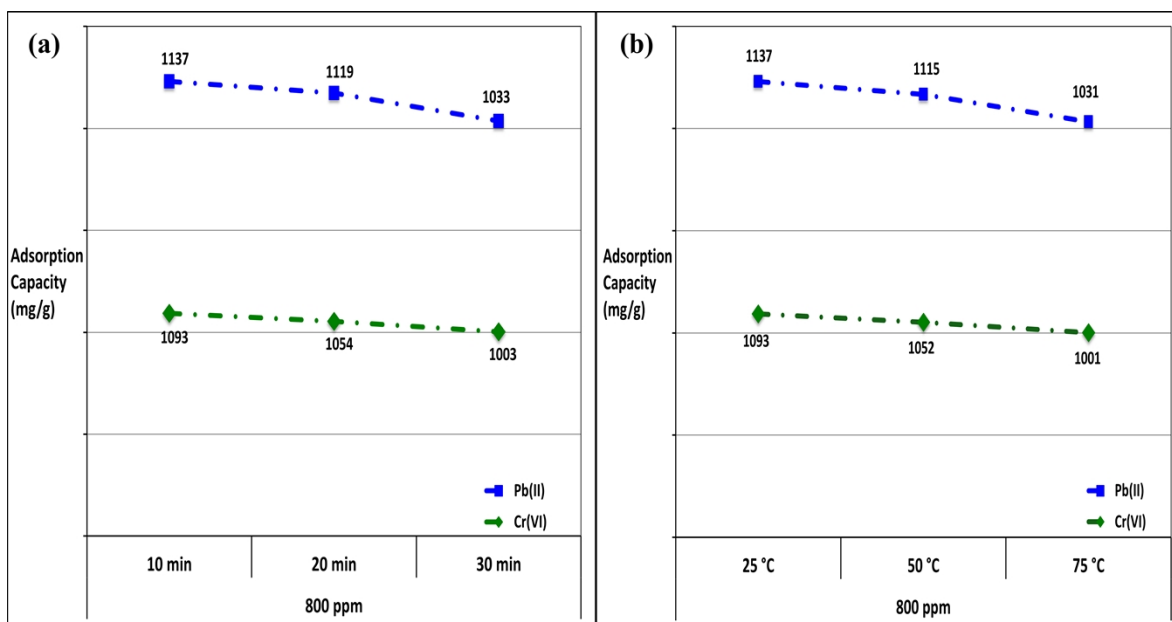

**Figure S4:** The effect of 800 ppm dosage on the adsorption capacity of  $Ti_3C_2T_x$  nanosheets at various sonication duration and temperatures range.

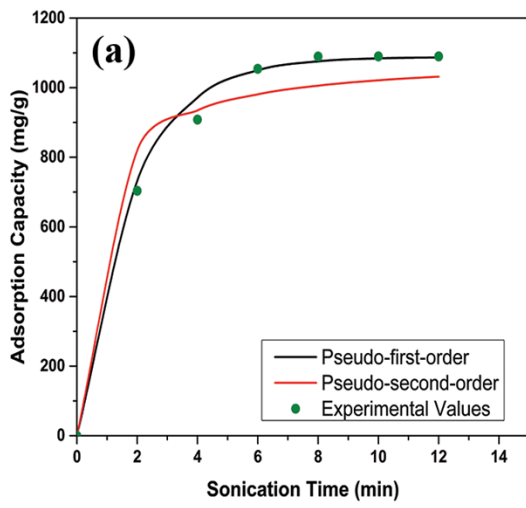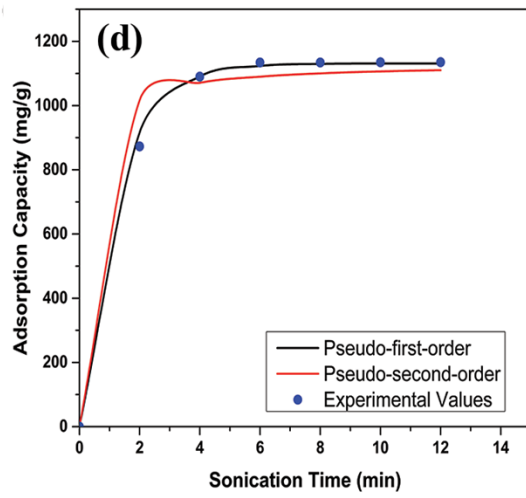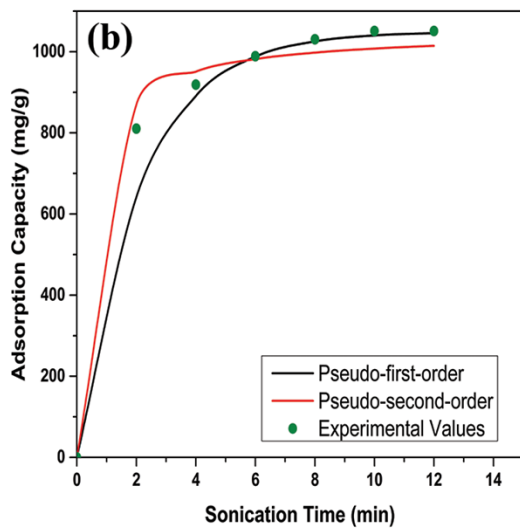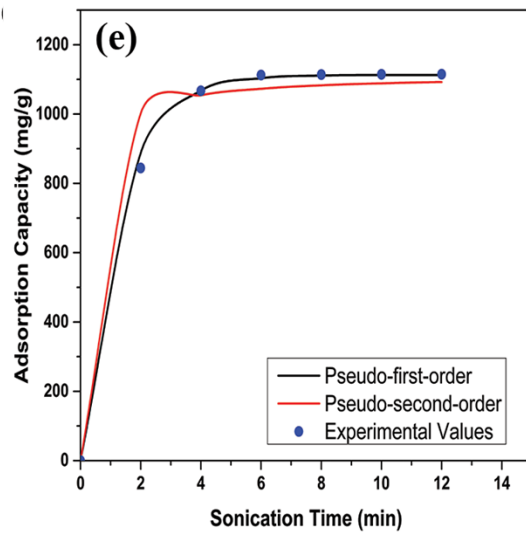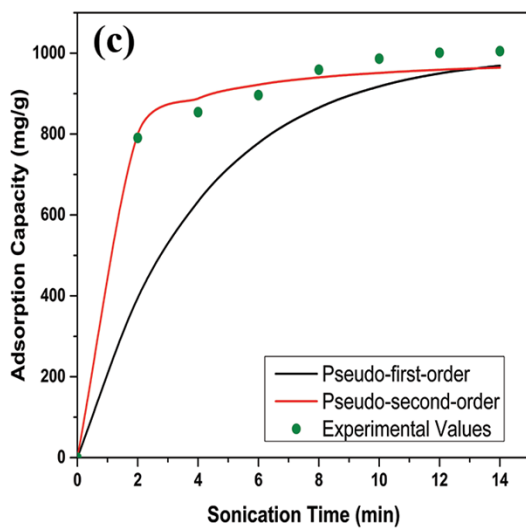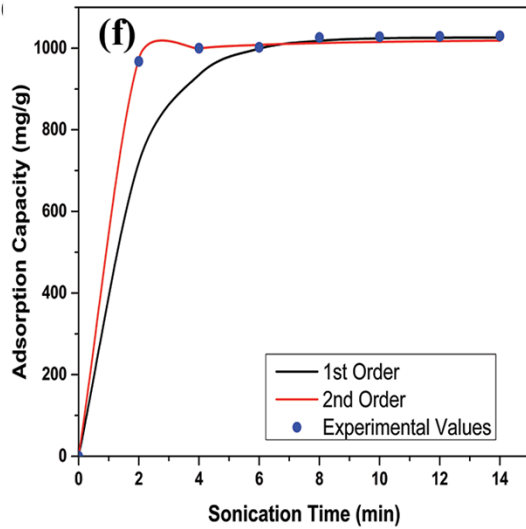

**Figure S5.** Pseudo orders reactions and equilibrium achieved for Cr (VI) adsorption at (a) 25 °C, (b) 50 °C (c) 75 °C and for Pb(II) adsorption at (d) 25 °C, (e) 50 °C (f) 75 °C.

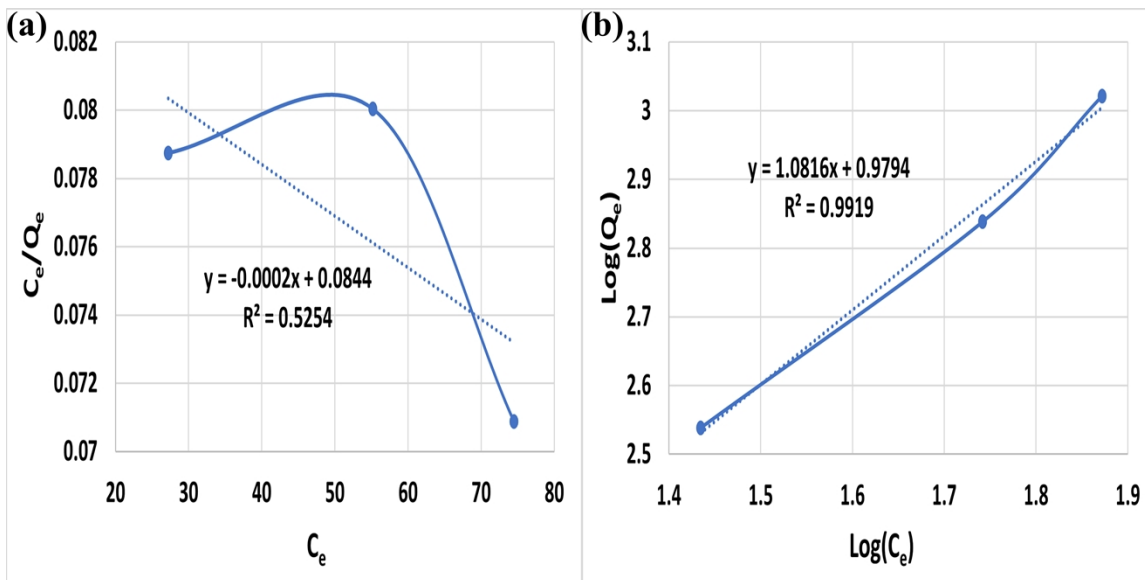

**Figure S6.** (a) Langmuir and (b) Freundlich adsorption isotherms for Cr(VI).

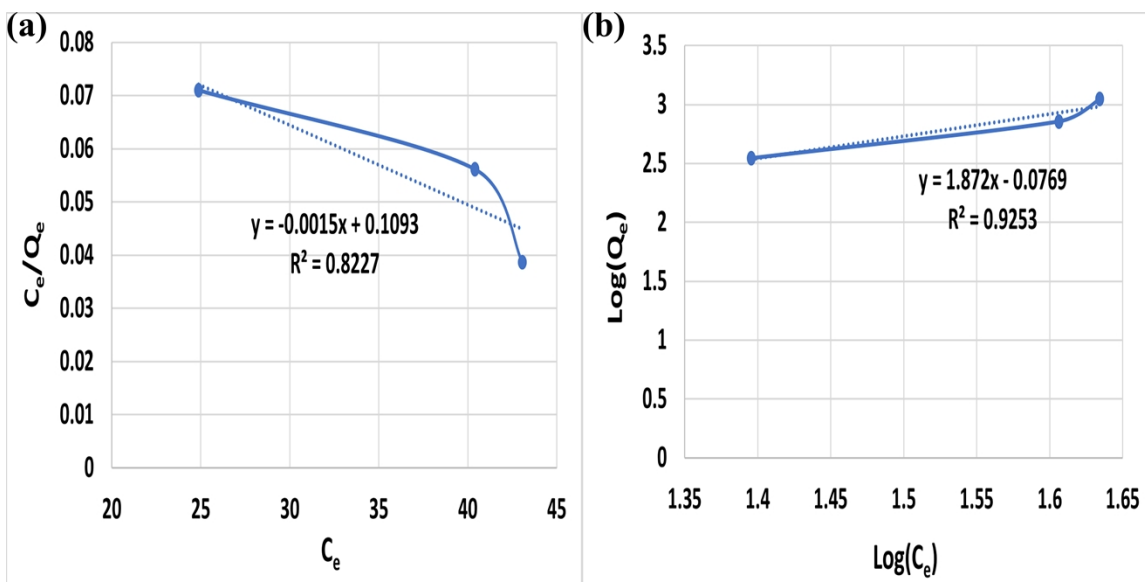

**Figure S7.** (a) Langmuir and (b) Freundlich adsorption isotherms for Pb(II).
